# Supplementary material for: Selection, Characterization, and Application of ssDNA Aptamer against Furaneol
Source: MDPI journal article supplement (doi:10.3390/molecules23123159), 2018-11-30
Supplement: s1 [file s1]

# **Selection and characterization of ssDNA aptamer against furaneol**

**Natalia Komarova <sup>1,\*</sup>, Mariia Andrianova <sup>1</sup>, Sergey Glukhov <sup>1</sup>, and Alexander Kuznetsov <sup>1</sup>**

<sup>1</sup> Scientific-Manufacturing Complex Technological Centre, 1–7 Shokin Square, Zelenograd, Moscow 124498, Russia; kae@tcen.ru

\* Correspondence: nat.v.kom@gmail.com; Tel.: +7-926-302-7969

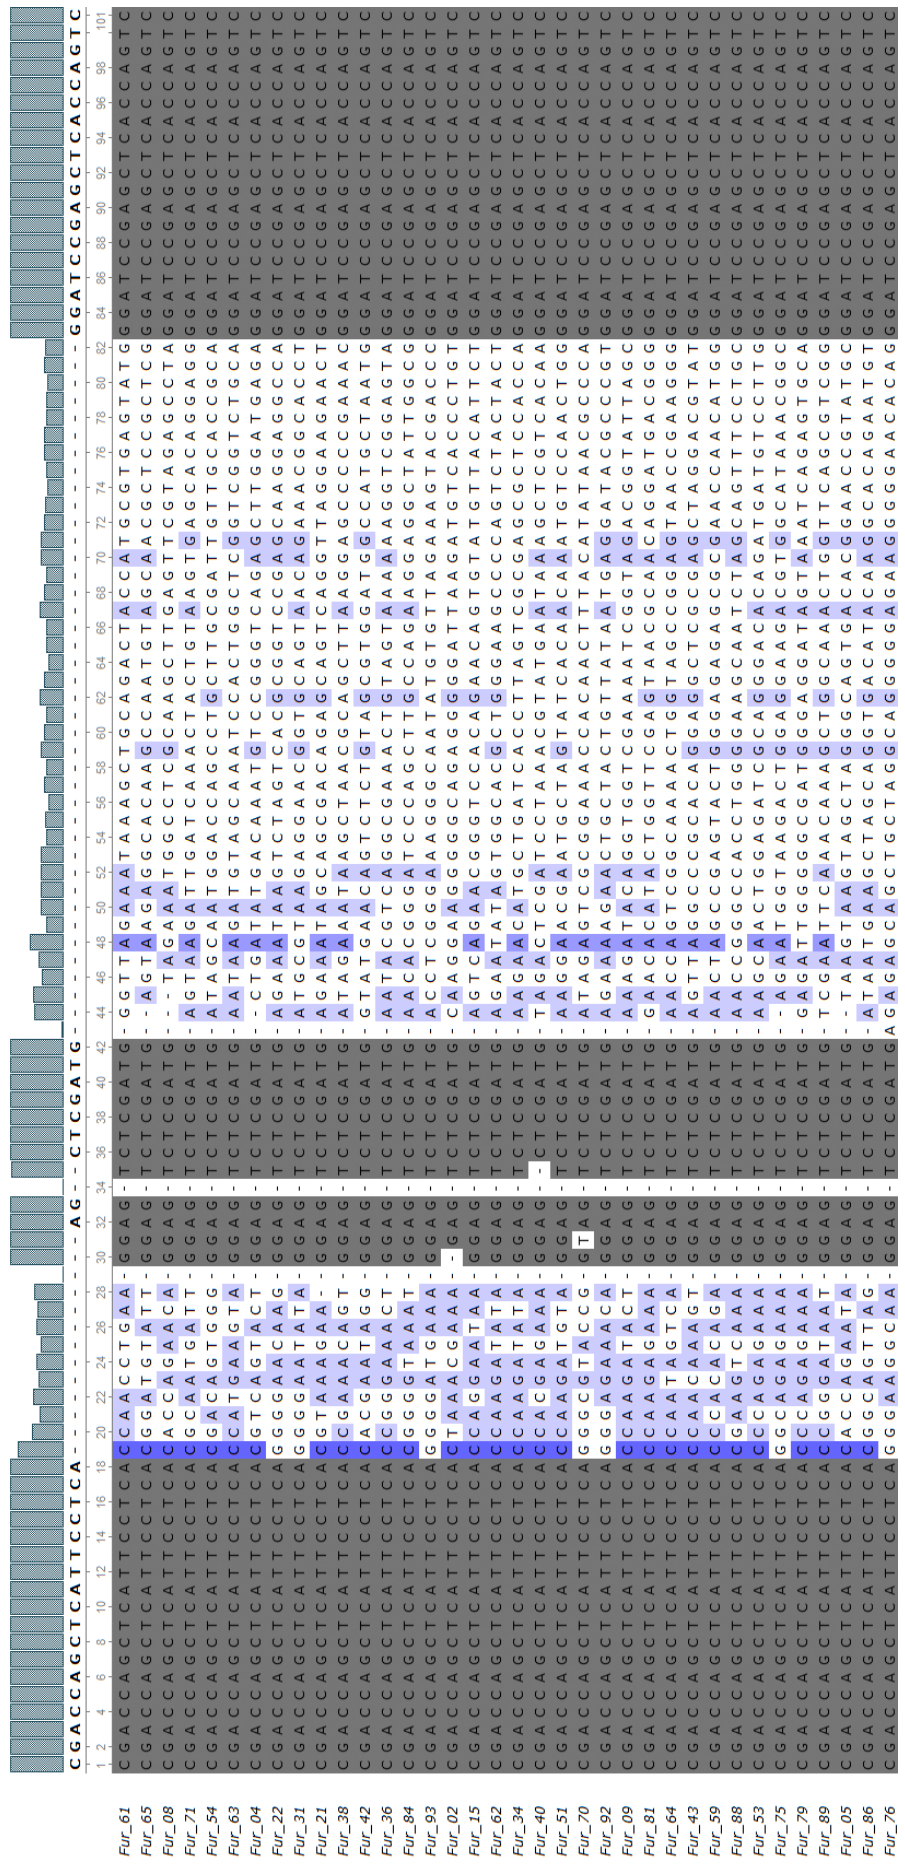

Figure S1. Alignment of the sequenced oligonucleotide pool. Constant regions of B1\_bank library are highlighted in grey.

|               |                                                                                                               |                      |
|---------------|---------------------------------------------------------------------------------------------------------------|----------------------|
| <i>Fur_87</i> | CGACCAGCTCATTCTCCTCAITGCAAGATATGGAGTCTCGATGAAAGAACTAGTCAGGACGTGATGAAAGGACAGGTA                                | GGATCCGAGCTCACCCAGTC |
| <i>Fur_49</i> | CGACCAGCTCATTCTCCTCACGCAAGAAATAGGAGTCTCGATGTAAAGAAATGTCAGAGCGGTCCAGACCGGTTGGTACGAG                            | GGATCCGAGCTCACCCAGTC |
| <i>Fur_82</i> | CGACCAGCTCATTCTCCTCACACTAACCGGGAGTCTCGATGATATAGCTGATTCGAGACCGCAACTGTGAAAGATCGTGGATCCGAGCTCACCCAGTC            | GGATCCGAGCTCACCCAGTC |
| <i>Fur_07</i> | CGACCAGCTCATTCTCCTCACCAACGGTCCGAGTCTCGATGGTAAGAAATCAATAGCTAGTCAACACGTGCCAGCACGGA                              | GGATCCGAGCTCACCCAGTC |
| <i>Fur_47</i> | CGACCAGCTCATTCTCCTCACCGAGCATAAAGGAGTCTCGATGACAAAGTAAAGGAGGCAATATGGTGTGCCCGGATGAGGATCCGAGCTCACCCAGTC           | GGATCCGAGCTCACCCAGTC |
| <i>Fur_58</i> | CGACCAGCTCATTCTCCTCACGATCCGGCGGAGTCTCGATGTCGCGCTAAATAGTGGCCCGCACTGGAGCTAACGTAAGGGATCCGAGCTCACCCAGTC           | GGATCCGAGCTCACCCAGTC |
| <i>Fur_03</i> | CGACCAGCTCATTCTCCTCACGCCCGCGAGGAGTCTCGATGACAGGAGGKCAACGGGATGATCCAGCGCGTCCGGGG                                 | GGATCCGAGCTCACCCAGTC |
| <i>Fur_52</i> | CGACCAGCTCATTCTCCTCACAGATAAAAGGAGTCTCGATGAGAAAGATGCAAGGGATAGTGTAGCGTGGGGCACTGGATCCGAGCTCACCCAGTC              | GGATCCGAGCTCACCCAGTC |
| <i>Fur_69</i> | CGACCAGCTCATTCTCCTCACAGAAGAAAGGAGTCTCGATGTAGATGCGCAGTGAAGCTGACACCTGTGAACGAACA                                 | GGATCCGAGCTCACCCAGTC |
| <i>Fur_16</i> | CGACCAGCTCATTCTCCTCACCAAGAAAGGAGTCTCGATGAAAAAGCTGATGGTCTCGCTCACTGTACACAGCAA                                   | GGATCCGAGCTCACCCAGTC |
| <i>Fur_67</i> | CGACCAGCTCATTCTCCTCACCGTAAACCTGGAGTCTCGATGAAAGTGGCTAGTCAGAGAGCTGAACGCTGCAACAGCAGGATCCGAGCTCACCCAGTC           | GGATCCGAGCTCACCCAGTC |
| <i>Fur_68</i> | CGACCAGCTCATTCTCCTCACCAAGAAAGGAGTCTCGATGATGAAGAAAGGCACTAATGTACCGAGCTGAGGTGGGAA                                | GGATCCGAGCTCACCCAGTC |
| <i>Fur_26</i> | CGACCAGCTCATTCTCCTCACAGTACTTGGAGTCTCGATGAGAAATGCAAGGATACAGATGGATCTTGAGCCGAAGGGATCCGAGCTCACCCAGTC              | GGATCCGAGCTCACCCAGTC |
| <i>Fur_96</i> | CGACCAGCTCATTCTCCTCACAGAAATTTGGAGTCTCGATGATGGATCAACTGGCCCGCAAGCTGATGGTATCAGGGATCCGAGCTCACCCAGTC               | GGATCCGAGCTCACCCAGTC |
| <i>Fur_27</i> | CGACCAGCTCATTCTCCTCACACAAAGTTGGAGTCTCGATGCTAGTCACTGGTAAGCTGACATAAAGCCCGCA                                     | GGATCCGAGCTCACCCAGTC |
| <i>Fur_45</i> | CGACCAGCTCATTCTCCTCACACAGAAGAGGAGTCTCGATGAAAGCAAACTGCGCGCGAGGACAAACAGAAACGCTGGGATCCGAGCTCACCCAGTC             | GGATCCGAGCTCACCCAGTC |
| <i>Fur_28</i> | CGACCAGCTCATTCTCCTCACCAACGAAAGGAGTCTCGATGAAGTGAACATGGAGGGCTCAACTGCGCGTGCAAGGT                                 | GGATCCGAGCTCACCCAGTC |
| <i>Fur_74</i> | CGACCAGCTCATTCTCCTCACAGCATGTAAAGGAGTCTCGATGAAGTCCCGTGGCGATGGTCAAGTGTGCAAGCCGAGA                               | GGATCCGAGCTCACCCAGTC |
| <i>Fur_95</i> | CGACCAGCTCATTCTCCTCACAGCAACTGGAGTCTCGATGAGAAATGGAATGCAATGGGTCAAGGGGGATGCTCGGGGGATCCGAGCTCACCCAGTC             | GGATCCGAGCTCACCCAGTC |
| <i>Fur_12</i> | CGACCAGCTCATTCTCCTCACAGGACACGGAGTCTCGATGACAAAGATCTTAGGAAGAACATCTCGATGCGAGACTA                                 | GGATCCGAGCTCACCCAGTC |
| <i>Fur_48</i> | CGACCAGCTCATTCTCCTCACCAAAACATGGAGTCTCGATGAAATAAGAACCGTCAAACTGTGGAAAGCGACATAGGGATCCGAGCTCACCCAGTC              | GGATCCGAGCTCACCCAGTC |
| <i>Fur_14</i> | CGACCAGCTCATTCTCCTCACAGAGAAAAGGAGTCTCGATGAACTGCGAGCCGGATCGACCCTATGCGAGTAGTGGTGGATCCGAGCTCACCCAGTC             | GGATCCGAGCTCACCCAGTC |
| <i>Fur_37</i> | CGACCAGCTCATTCTCCTCACAGCACCGAAGGAGTCTCGATGAAAACTCAACTGACTTGGACGGTGGCCGACATGCCCAC                              | GGATCCGAGCTCACCCAGTC |
| <i>Fur_72</i> | CGACCAGCTCATTCTCCTCACGAAACCCAAGGAGTCTCGATGAATCACGGAAGCTGGTAGGAAACAGGATGAAACAGAAAGCCATGGATCCGAGCTCACCCAGTC     | GGATCCGAGCTCACCCAGTC |
| <i>Fur_83</i> | CGACCAGCTCATTCTCCTCACGAAAGTAAAGGAGTCTCGATGAACCAAGTACTGTAGCGGAAACACAGTACGAAGATCTGGATCCGAGCTCACCCAGTC           | GGATCCGAGCTCACCCAGTC |
| <i>Fur_25</i> | CGACCAGCTCATTCTCCTCACGCAACATCGGAGTCTCGATGTAGTAAAGAAAGTGGATCGGAGCAACACCGCCAGCCGCTGGATCCGAGCTCACCCAGTC          | GGATCCGAGCTCACCCAGTC |
| <i>Fur_30</i> | CGACCAGCTCATTCTCCTCACCATGCCAGGAGTCTCGATGTAGAGCGAAGTCCACCGCGAACAGACAGCAACAGCCAGTGGATCCGAGCTCACCCAGTC           | GGATCCGAGCTCACCCAGTC |
| <i>Fur_19</i> | CGACCAGCTCATTCTCCTCACAGCCCAAGGAGTCTCGATGTGAATTAAGCCACAGGCGCTGTGATCAACGGGTACGAATGGATCCGAGCTCACCCAGTC           | GGATCCGAGCTCACCCAGTC |
| <i>Fur_56</i> | CGACCAGCTCATTCTCCTCACAGCAAAACGGAGTCTCGATGCAAGTAAAGATAACAGTCTGGAGCCGAAACCACTCGGGAAACCACTCGGGATCCGAGCTCACCCAGTC | GGATCCGAGCTCACCCAGTC |
| <i>Fur_20</i> | CGACCAGCTCATTCTCCTCACCAATAACAGGAGTCTCGATGAATAACACAGGGTACGGGTAGCCAGTCACTAACGATGGATCCGAGCTCACCCAGTC             | GGATCCGAGCTCACCCAGTC |
| <i>Fur_78</i> | CGACCAGCTCATTCTCCTCACCAAGTCACTGGAGTCTCGATGAAGAAAGCGGTCGTAAACAGGTGGGGCACGGAATAGGGATCCGAGCTCACCCAGTC            | GGATCCGAGCTCACCCAGTC |
| <i>Fur_85</i> | CGACCAGCTCATTCTCCTCACCAATACACGGAGTCTCGATGAAGTAAAGAAAGGGCGCCAGACGAAAGCCCGTATGGATCCGAGCTCACCCAGTC               | GGATCCGAGCTCACCCAGTC |
| <i>Fur_32</i> | CGACCAGCTCATTCTCCTCACGGAGCGTAAAGGAGTCTCGATGAAGCAGGAAGCCGGGGCTACCGAGCCCAAGACCTGGATCCGAGCTCACCCAGTC             | GGATCCGAGCTCACCCAGTC |
| <i>Fur_44</i> | CGACCAGCTCATTCTCCTCACAGAAACAAGGAGTCTCGATGAAATGAACAACACTGACTCAAGAGCCGAAACAACATGGATCCGAGCTCACCCAGTC             | GGATCCGAGCTCACCCAGTC |
| <i>Fur_41</i> | CGACCAGCTCATTCTCCTCACAGAGAAATGGAGTCTCGATGATGATAGGAGCCGAGTCTCGACTAGAAATGACTACAGGGATCCGAGCTCACCCAGTC            | GGATCCGAGCTCACCCAGTC |
| <i>Fur_01</i> | CGACCAGCTCATTCTCCTCACGGCAAGTAAAGGAGTCTCGATCTCACGATAGTAAATGGCAATGGCAATGAAACAAGCCGCGG                           | GGATCCGAGCTCACCCAGTC |

**Figure S1.** Alignment of the sequenced oligonucleotide pool (continuation). Constant regions of B1\_bank library are highlighted in grey.

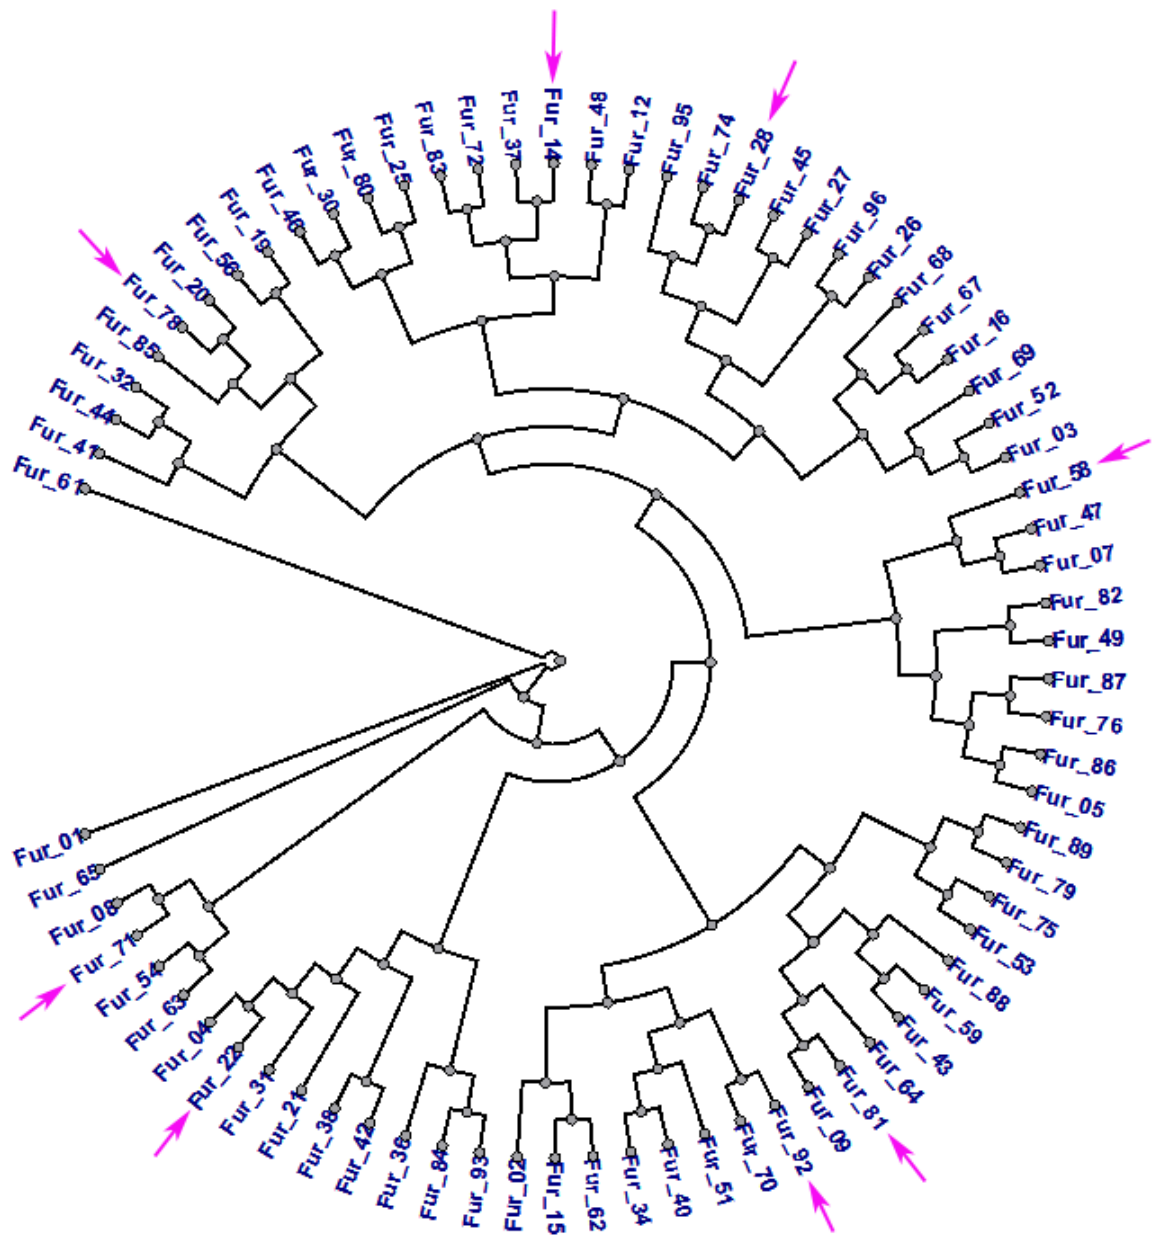

Figure S2. Phylogenetic tree of the sequenced pool of oligonucleotides.

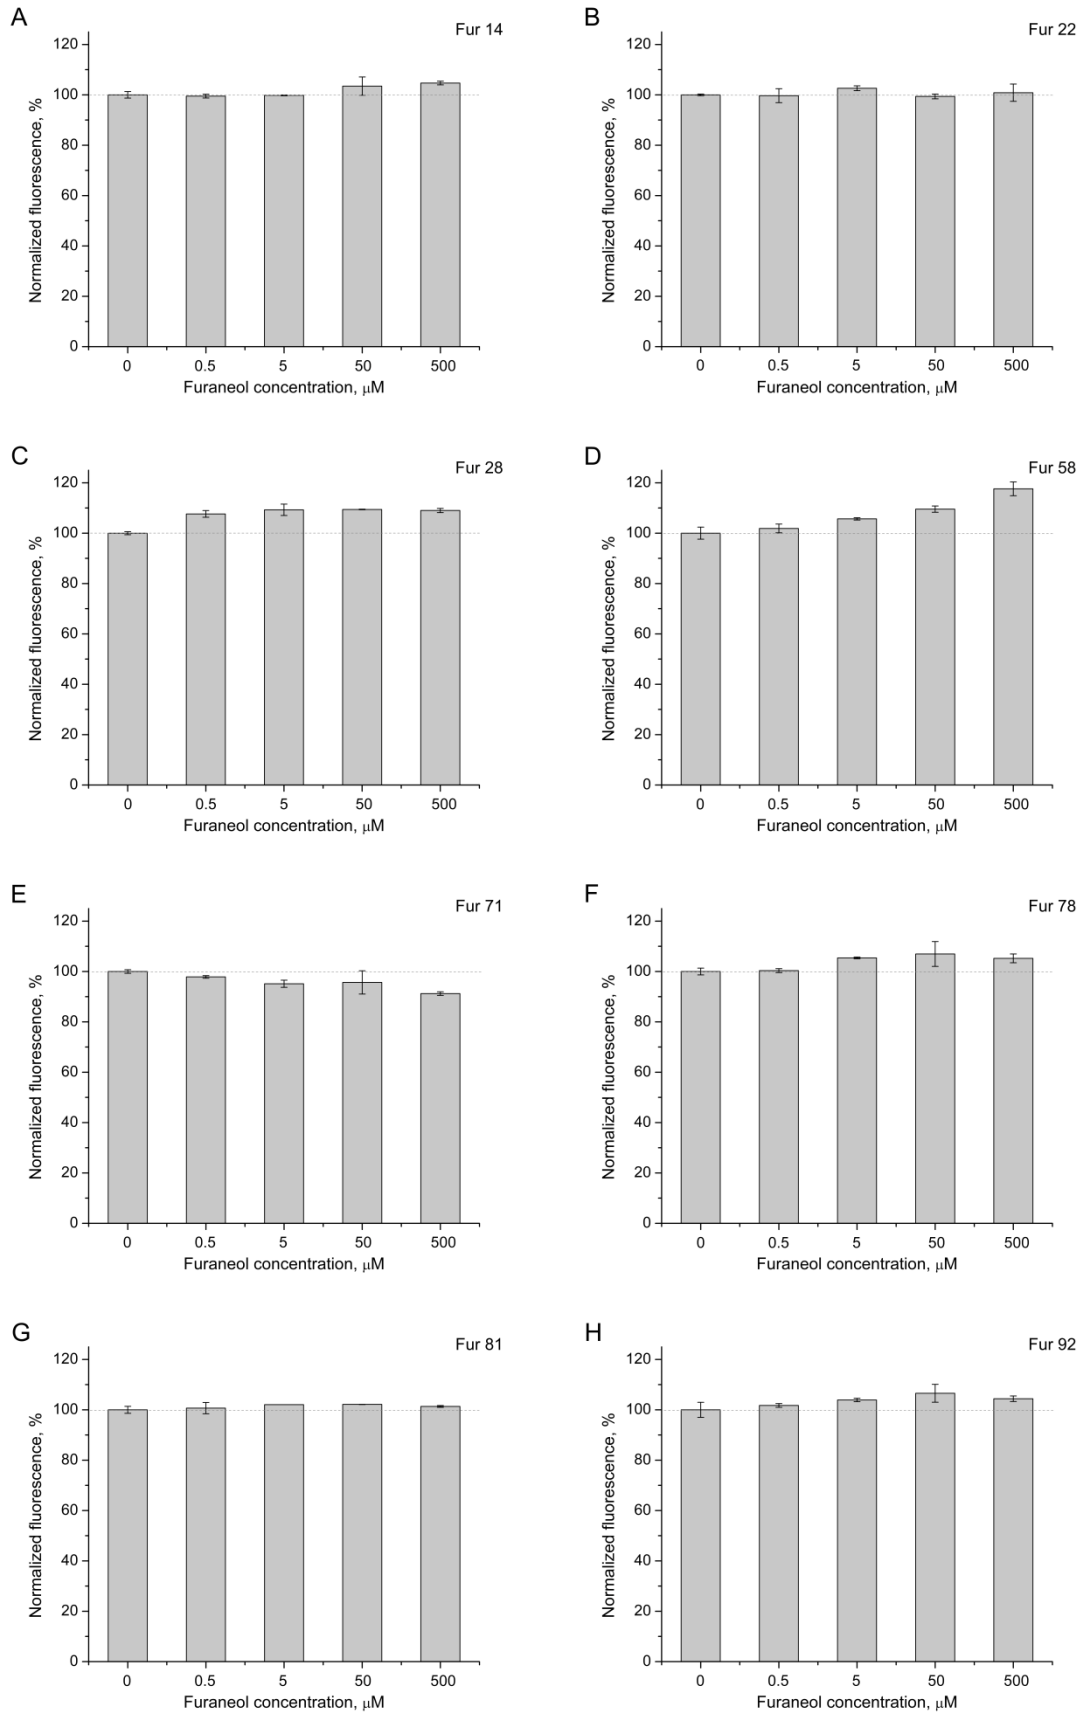

**Figure S3.** Results of elution-based binding assay for candidate aptamers.

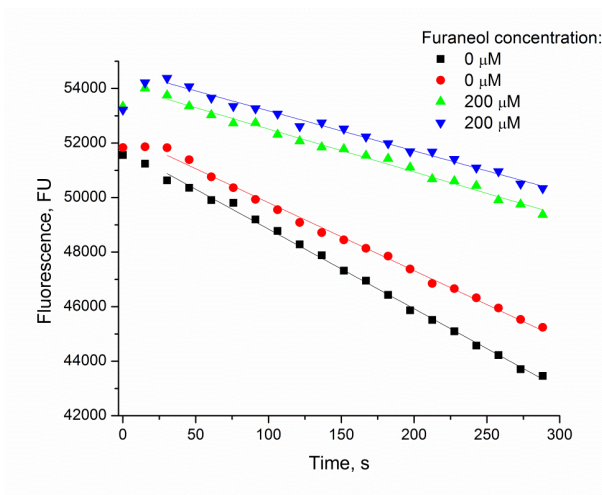

(a)

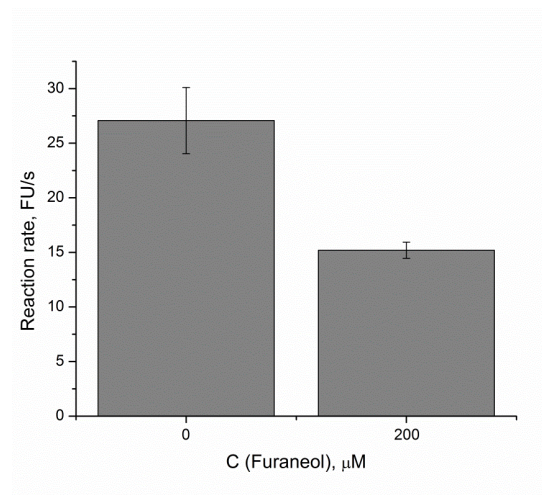

(b)

**Figure S4.** (a) Time dependence of fluorescent signal during digestion of Fur14 oligonucleotide by Exo I in the absence of furaneol and in the presence of 200  $\mu\text{M}$  furaneol; (b) Comparison of exonuclease reaction rate for Fur14 the absence of furaneol and in the presence of 200  $\mu\text{M}$  furaneol. Measurements were performed in duplicate, error bars were calculated as standard deviation. The difference between the bars proved to be statistically significant with  $p=0.05$ .
